# Supplementary material
Source: publisher figshare collection journal article supplement (https://tandf.figshare.com/articles/dataset/_/9197540)
Supplement: Supplementary file 1 [file 1]

Supplementary Table 1 LA-ICP-MS zircon U–Pb data for the volcanic rocks in the Houay kham area.

| Analysis_# | 207Pb/235U |            | 206Pb/238U |            | 207Pb/235U |            | 206Pb/238U |            | Th/U |
|------------|------------|------------|------------|------------|------------|------------|------------|------------|------|
|            | Ratio      | 1 $\delta$ | Ratio      | 1 $\delta$ | age        | 1 $\delta$ | age        | 1 $\delta$ |      |
| B1-01      | 1.63381    | 0.02187    | 0.07184    | 0.00079    | 983.3      | 8.43       | 447.2      | 4.74       | 0.64 |
| B1-02      | 0.56057    | 0.00712    | 0.0724     | 0.0008     | 451.9      | 4.63       | 450.6      | 4.83       | 0.39 |
| B1-03      | 0.72656    | 0.01264    | 0.07267    | 0.00083    | 554.5      | 7.43       | 452.2      | 5.01       | 0.48 |
| B1-04      | 0.55949    | 0.00875    | 0.07218    | 0.00084    | 451.2      | 5.7        | 449.3      | 5.03       | 0.54 |
| B1-05      | 0.55968    | 0.01214    | 0.07245    | 0.00086    | 451.3      | 7.9        | 450.9      | 5.2        | 0.47 |
| B1-06      | 0.51178    | 0.00877    | 0.07254    | 0.00087    | 419.6      | 5.89       | 451.4      | 5.24       | 0.38 |
| B1-07      | 0.45623    | 0.01558    | 0.0726     | 0.00104    | 381.6      | 10.86      | 451.8      | 6.28       | 0.36 |
| B1-08      | 0.50939    | 0.0194     | 0.07247    | 0.00105    | 418.0      | 13.05      | 451        | 6.31       | 0.45 |
| B1-09      | 0.54601    | 0.02291    | 0.07257    | 0.00112    | 442.4      | 15.05      | 451.6      | 6.7        | 0.55 |
| B1-10      | 0.52643    | 0.02286    | 0.07198    | 0.00114    | 429.4      | 15.21      | 448.1      | 6.87       | 0.38 |
| B1-11      | 0.55575    | 0.02674    | 0.07259    | 0.00115    | 448.8      | 17.45      | 451.7      | 6.88       | 0.35 |
| B1-12      | 1.78562    | 0.05009    | 0.07903    | 0.0012     | 1040.2     | 18.26      | 490.3      | 7.14       | 0.51 |
| B1-13      | 2.24885    | 0.04338    | 0.08882    | 0.00121    | 1196.4     | 13.56      | 548.5      | 7.15       | 0.63 |
| B1-14      | 2.70963    | 0.05808    | 0.08889    | 0.00125    | 1331.1     | 15.9       | 549.0      | 7.4        | 0.47 |
| B1-15      | 0.78317    | 0.04603    | 0.07242    | 0.00147    | 587.3      | 26.21      | 450.7      | 8.84       | 0.37 |
| B1-16      | 1.55682    | 0.0912     | 0.07901    | 0.00196    | 953.2      | 36.22      | 490.2      | 11.72      | 0.49 |
| B1-18      | 0.55504    | 0.01427    | 0.07221    | 0.0009     | 448.3      | 9.32       | 449.5      | 5.44       | 0.73 |
| B1-19      | 0.55285    | 0.01099    | 0.07237    | 0.00089    | 446.9      | 7.18       | 450.4      | 5.33       | 0.57 |
| B1-20      | 0.54728    | 0.01263    | 0.07074    | 0.00091    | 443.2      | 8.29       | 440.6      | 5.5        | 0.47 |
| B1-21      | 0.58084    | 0.01949    | 0.07215    | 0.00103    | 465.0      | 12.52      | 449.1      | 6.22       | 0.44 |
| B1-22      | 0.59035    | 0.01149    | 0.07215    | 0.00085    | 471.1      | 7.34       | 449.1      | 5.12       | 0.39 |

|       |         |         |         |         |       |       |       |      |      |
|-------|---------|---------|---------|---------|-------|-------|-------|------|------|
| B1-23 | 0.89154 | 0.01286 | 0.07216 | 0.00082 | 647.2 | 6.9   | 449.2 | 4.92 | 0.39 |
| B1-24 | 0.53232 | 0.01235 | 0.0722  | 0.00091 | 433.3 | 8.19  | 449.4 | 5.47 | 0.45 |
| B1-25 | 0.83431 | 0.01134 | 0.07241 | 0.00081 | 616.0 | 6.28  | 450.6 | 4.87 | 0.45 |
| B1-26 | 0.98834 | 0.02111 | 0.07242 | 0.00087 | 697.9 | 10.78 | 450.7 | 5.23 | 0.38 |
| B1-27 | 0.60423 | 0.0144  | 0.07263 | 0.00093 | 479.9 | 9.11  | 452.0 | 5.61 | 0.55 |
| B1-28 | 0.53826 | 0.00988 | 0.0725  | 0.00085 | 437.3 | 6.52  | 451.2 | 5.14 | 1.91 |
| B1-29 | 0.41894 | 0.0148  | 0.07243 | 0.00114 | 355.3 | 10.59 | 450.8 | 6.84 | 0.42 |
| B1-30 | 0.54025 | 0.0078  | 0.07217 | 0.0008  | 438.6 | 5.14  | 449.2 | 4.8  | 0.59 |
| B2-01 | 0.52036 | 0.00819 | 0.0667  | 0.00075 | 425.4 | 5.47  | 416.2 | 4.55 | 0.44 |
| B2-02 | 0.56027 | 0.01233 | 0.06678 | 0.00083 | 451.7 | 8.02  | 416.8 | 5.02 | 0.54 |
| B2-03 | 0.4883  | 0.00765 | 0.06686 | 0.00077 | 403.7 | 5.22  | 417.2 | 4.63 | 0.56 |
| B2-04 | 0.54075 | 0.0165  | 0.06681 | 0.00095 | 438.9 | 10.88 | 416.9 | 5.75 | 0.55 |
| B2-05 | 0.50052 | 0.01393 | 0.06691 | 0.00091 | 412.1 | 9.42  | 417.5 | 5.49 | 0.71 |
| B3-01 | 0.486   | 0.01138 | 0.06734 | 0.00087 | 402.2 | 7.77  | 420.1 | 5.25 | 0.55 |
| B3-02 | 0.58458 | 0.00781 | 0.06727 | 0.00075 | 467.4 | 5     | 419.7 | 4.55 | 0.50 |
| B3-03 | 0.52549 | 0.00916 | 0.06725 | 0.00077 | 428.8 | 6.1   | 419.6 | 4.65 | 0.50 |
| B3-04 | 0.52556 | 0.0088  | 0.06724 | 0.00075 | 428.9 | 5.86  | 419.5 | 4.53 | 0.43 |
| B3-05 | 0.46167 | 0.01057 | 0.06726 | 0.00087 | 385.4 | 7.35  | 419.6 | 5.28 | 0.60 |
| B3-06 | 0.46643 | 0.01328 | 0.06761 | 0.00092 | 388.7 | 9.19  | 421.8 | 5.57 | 0.58 |
| B3-07 | 0.4617  | 0.01194 | 0.06727 | 0.00089 | 385.4 | 8.3   | 419.7 | 5.4  | 1.25 |
| B3-08 | 0.50721 | 0.01899 | 0.06719 | 0.00101 | 416.6 | 12.79 | 419.2 | 6.11 | 0.47 |
| B3-09 | 0.52331 | 0.00961 | 0.06726 | 0.00078 | 427.4 | 6.41  | 419.6 | 4.74 | 0.34 |
| B3-10 | 0.89507 | 0.02686 | 0.06717 | 0.00105 | 649.1 | 14.39 | 419.1 | 6.34 | 0.46 |
| B3-11 | 0.51519 | 0.01484 | 0.06701 | 0.00085 | 421.9 | 9.95  | 418.1 | 5.14 | 0.45 |
| B3-12 | 0.52116 | 0.02058 | 0.06714 | 0.00103 | 425.9 | 13.74 | 418.9 | 6.2  | 0.49 |
| B3-13 | 0.47083 | 0.01191 | 0.06724 | 0.00088 | 391.8 | 8.22  | 419.5 | 5.3  | 0.95 |

|       |         |         |         |         |       |       |       |      |      |
|-------|---------|---------|---------|---------|-------|-------|-------|------|------|
| B3-14 | 0.61379 | 0.01128 | 0.06713 | 0.00078 | 485.9 | 7.1   | 418.9 | 4.74 | 0.72 |
| B3-15 | 0.52609 | 0.01109 | 0.06728 | 0.00079 | 429.2 | 7.38  | 419.8 | 4.79 | 0.69 |
| B3-16 | 0.55926 | 0.01251 | 0.0671  | 0.00079 | 451.0 | 8.15  | 418.6 | 4.76 | 0.80 |
| B3-17 | 0.60058 | 0.01678 | 0.06718 | 0.00087 | 477.6 | 10.64 | 419.1 | 5.26 | 0.56 |
| B3-18 | 0.42961 | 0.01754 | 0.06747 | 0.00103 | 362.9 | 12.46 | 420.9 | 6.22 | 0.95 |
| B3-19 | 0.48914 | 0.0179  | 0.06739 | 0.00099 | 404.3 | 12.21 | 420.4 | 5.96 | 0.62 |
| B3-20 | 0.69733 | 0.01291 | 0.06741 | 0.00081 | 537.2 | 7.72  | 420.5 | 4.87 | 0.58 |
| B3-21 | 0.7356  | 0.01365 | 0.06746 | 0.0008  | 559.8 | 7.98  | 420.8 | 4.8  | 0.50 |
| B3-22 | 1.11866 | 0.01611 | 0.06721 | 0.0008  | 762.3 | 7.72  | 419.3 | 4.81 | 0.94 |
| B3-23 | 0.58557 | 0.01392 | 0.06726 | 0.0008  | 468.0 | 8.91  | 419.6 | 4.86 | 0.62 |
| B3-24 | 0.48599 | 0.01151 | 0.06741 | 0.00086 | 402.2 | 7.86  | 420.5 | 5.19 | 0.54 |
| B3-25 | 0.53135 | 0.01586 | 0.06736 | 0.00093 | 432.7 | 10.51 | 420.2 | 5.64 | 0.58 |
| B3-26 | 0.52824 | 0.02244 | 0.0674  | 0.00106 | 430.6 | 14.91 | 420.5 | 6.42 | 0.52 |
| B3-27 | 0.58346 | 0.0106  | 0.0674  | 0.00081 | 466.7 | 6.8   | 420.5 | 4.89 | 0.48 |
| B3-28 | 0.68072 | 0.01027 | 0.06733 | 0.00077 | 527.2 | 6.2   | 420.1 | 4.67 | 0.59 |
| B3-29 | 0.93128 | 0.01375 | 0.06733 | 0.00078 | 668.3 | 7.23  | 420.1 | 4.69 | 0.48 |
| B3-30 | 0.62526 | 0.01209 | 0.0674  | 0.00081 | 493.1 | 7.55  | 420.5 | 4.87 | 0.53 |
| B3-31 | 0.71719 | 0.01313 | 0.06743 | 0.0008  | 549.0 | 7.76  | 420.7 | 4.82 | 0.73 |
| B3-32 | 0.53918 | 0.01726 | 0.06734 | 0.00096 | 437.9 | 11.38 | 420.1 | 5.8  | 0.50 |
| B3-33 | 0.66483 | 0.01701 | 0.06786 | 0.00086 | 517.6 | 10.37 | 423.2 | 5.17 | 0.55 |
| B3-34 | 0.5525  | 0.01086 | 0.06739 | 0.00077 | 446.6 | 7.1   | 420.4 | 4.68 | 0.52 |
| B3-35 | 0.60178 | 0.0107  | 0.06765 | 0.0008  | 478.4 | 6.78  | 422.0 | 4.82 | 0.42 |
| B3-36 | 0.58077 | 0.01287 | 0.06722 | 0.00084 | 465.0 | 8.26  | 419.4 | 5.09 | 1.04 |
| B3-37 | 0.48605 | 0.01007 | 0.06737 | 0.00089 | 402.2 | 6.88  | 420.3 | 5.35 | 0.35 |
| B3-38 | 0.52352 | 0.01729 | 0.06775 | 0.00097 | 427.5 | 11.52 | 422.6 | 5.88 | 0.95 |
| B3-39 | 0.60467 | 0.01464 | 0.06742 | 0.00087 | 480.2 | 9.26  | 420.6 | 5.27 | 0.71 |

|       |         |         |         |         |       |       |       |      |      |
|-------|---------|---------|---------|---------|-------|-------|-------|------|------|
| B3-40 | 0.76548 | 0.01244 | 0.06716 | 0.00079 | 577.2 | 7.16  | 419.0 | 4.79 | 0.63 |
| B3-41 | 0.71098 | 0.01277 | 0.06723 | 0.00083 | 545.3 | 7.58  | 419.4 | 5    | 0.78 |
| B3-42 | 0.51284 | 0.0145  | 0.06726 | 0.00092 | 420.4 | 9.73  | 419.6 | 5.54 | 0.46 |
| B3-43 | 0.51091 | 0.0099  | 0.06725 | 0.00076 | 419.1 | 6.65  | 419.6 | 4.61 | 0.60 |
| B3-44 | 0.50644 | 0.01827 | 0.06728 | 0.001   | 416.0 | 12.31 | 419.7 | 6.02 | 0.54 |
| B3-45 | 0.56623 | 0.00941 | 0.06729 | 0.00077 | 455.6 | 6.1   | 419.8 | 4.67 | 0.46 |
| B3-46 | 0.56579 | 0.01119 | 0.0673  | 0.00082 | 455.3 | 7.26  | 419.9 | 4.97 | 0.52 |
| B3-47 | 0.54946 | 0.02796 | 0.06731 | 0.00115 | 444.6 | 18.32 | 419.9 | 6.95 | 0.57 |
| B3-48 | 0.616   | 0.01031 | 0.06733 | 0.00078 | 487.3 | 6.48  | 420.1 | 4.7  | 0.35 |
| B3-49 | 0.60362 | 0.01987 | 0.06742 | 0.00092 | 479.5 | 12.58 | 420.6 | 5.56 | 0.36 |
| B3-50 | 0.53998 | 0.00901 | 0.06747 | 0.00077 | 438.4 | 5.94  | 420.9 | 4.66 | 0.34 |
| B3-51 | 0.5006  | 0.02092 | 0.06752 | 0.00104 | 412.1 | 14.16 | 421.2 | 6.28 | 0.52 |
| B3-52 | 0.48708 | 0.0321  | 0.06703 | 0.00125 | 402.9 | 21.92 | 418.3 | 7.57 | 0.46 |
| B3-53 | 0.58699 | 0.01665 | 0.06711 | 0.0009  | 468.9 | 10.65 | 418.7 | 5.43 | 0.39 |
| B3-54 | 0.51213 | 0.0078  | 0.06732 | 0.00079 | 419.9 | 5.24  | 420.0 | 4.78 | 0.47 |
| B3-55 | 0.52532 | 0.0138  | 0.06731 | 0.00089 | 428.7 | 9.19  | 419.9 | 5.35 | 0.43 |
| B3-56 | 0.45956 | 0.0093  | 0.06732 | 0.00083 | 384.0 | 6.47  | 420.0 | 5.03 | 0.62 |
| B3-57 | 0.48906 | 0.01149 | 0.06677 | 0.00083 | 404.3 | 7.84  | 416.6 | 5    | 0.50 |
| B3-58 | 0.45458 | 0.01364 | 0.06747 | 0.00092 | 380.5 | 9.52  | 420.9 | 5.57 | 0.41 |
| B3-59 | 1.08474 | 0.04303 | 0.06711 | 0.00115 | 745.9 | 20.96 | 418.7 | 6.97 | 0.45 |
| B3-60 | 0.56571 | 0.00994 | 0.06718 | 0.00076 | 455.2 | 6.44  | 419.2 | 4.59 | 0.76 |
| B3-61 | 0.54239 | 0.00779 | 0.06726 | 0.00076 | 440.0 | 5.13  | 419.6 | 4.58 | 0.59 |
| B3-62 | 0.45968 | 0.01226 | 0.06705 | 0.00089 | 384.0 | 8.53  | 418.3 | 5.4  | 0.47 |
| B3-63 | 0.50423 | 0.03315 | 0.0674  | 0.00129 | 414.6 | 22.38 | 420.5 | 7.8  | 0.46 |
| B3-64 | 0.51508 | 0.00691 | 0.06738 | 0.00077 | 421.9 | 4.63  | 420.3 | 4.64 | 0.48 |

---

B1: Dacitic tuff samples; B2: Fine-grained diorite sample ; B3: Brecciated rhyolite tuff sample

Supplementary Table 2 Major and trace element data for pyroclastic rocks in the Houay kham area (major oxide in wt.%, trace element in ppm).

| Sample                           | B035-1  | B035-2  | B39     | B49-1   | B49-2   | B034-1  | B034-2  | B047    | B016       | B25        | B26        | B22        | B23        | B28        | BHVO-2   |          |
|----------------------------------|---------|---------|---------|---------|---------|---------|---------|---------|------------|------------|------------|------------|------------|------------|----------|----------|
|                                  | dacitic | dacitic | diorite | diorite | diorite | dacitic | dacitic | dacitic | brecciated | brecciated | brecciated | brecciated | brecciated | brecciated |          | Detected |
|                                  | tuff    | tuff    |         |         |         | tuff    | tuff    | tuff    | rhyolite   | rhyolite   | rhyolite   | rhyolite   | rhyolite   | rhyolite   | Standard | limits   |
| elements                         |         |         |         |         |         |         |         |         | tuff       | tuff       | tuff       | tuff       | tuff       | tuff       |          |          |
| Al <sub>2</sub> O <sub>3</sub>   | 13.2    | 12.3    | 16.7    | 17.8    | 17.0    | 12.4    | 12.4    | 12.7    | 6.62       | 10.0       | 10.1       | 13.0       | 13.4       | 12.9       | 13.5     | 0.20     |
| CaO                              | 1.42    | 1.78    | 5.41    | 6.59    | 7.87    | 1.47    | 2.07    | 0.15    | 0.05       | 0.02       | 0.02       | 0.03       | 0.02       | 0.06       | 11.2     | 0.20     |
| TFe <sub>2</sub> O <sub>3</sub>  | 3.07    | 2.73    | 6.85    | 6.46    | 7.13    | 1.98    | 1.99    | 1.84    | 3.09       | 1.34       | 6.46       | 1.97       | 2.27       | 1.37       | 12.5     | 0.20     |
| K <sub>2</sub> O                 | 2.75    | 2.84    | 3.88    | 4.30    | 3.82    | 2.77    | 2.78    | 2.77    | 1.88       | 3.08       | 2.93       | 3.92       | 4.06       | 3.10       | 0.53     | 0.01     |
| MgO                              | 0.44    | 0.37    | 2.74    | 2.29    | 2.36    | 0.33    | 0.34    | 0.27    | 0.10       | 0.17       | 0.18       | 0.27       | 0.28       | 0.31       | 7.18     | 0.08     |
| MnO                              | 0.06    | 0.06    | 0.24    | 0.19    | 0.24    | 0.04    | 0.05    | 0.07    | 0.01       | 0.01       | 0.05       | 0.01       | 0.01       | 0.03       | 0.17     | 0.01     |
| Na <sub>2</sub> O                | 3.68    | 3.36    | 3.04    | 1.87    | 2.10    | 2.56    | 2.48    | 3.40    | 0.03       | 0.03       | 0.05       | 0.12       | 0.12       | 0.34       | 2.23     | 0.02     |
| P <sub>2</sub> O <sub>5</sub>    | 0.07    | 0.06    | 0.28    | 0.31    | 0.31    | 0.04    | 0.04    | 0.02    | 0.02       | 0.01       | 0.01       | 0.02       | 0.03       | 0.01       | 0.25     | 0.01     |
| SiO <sub>2</sub>                 | 71.9    | 73.6    | 49.0    | 48.7    | 46.7    | 75.0    | 73.9    | 76.6    | 86.5       | 83.0       | 77.5       | 77.7       | 76.7       | 78.6       | 49.7     | 0.50     |
| TiO <sub>2</sub>                 | 0.33    | 0.27    | 0.81    | 0.86    | 0.84    | 0.21    | 0.19    | 0.21    | 0.07       | 0.07       | 0.16       | 0.18       | 0.19       | 0.19       | 2.71     | 0.05     |
| LOI                              | 2.79    | 2.93    | 10.5    | 9.86    | 10.8    | 2.90    | 3.29    | 1.43    | 1.38       | 1.89       | 2.08       | 2.25       | 2.31       | 2.39       |          |          |
| Total                            | 99.7    | 100     | 99.5    | 99.3    | 99.3    | 99.7    | 99.6    | 99.5    | 99.7       | 99.7       | 99.6       | 99.6       | 99.5       | 99.4       |          |          |
| Al <sub>2</sub> O <sub>3</sub> # | 13.8    | 12.8    | 19.6    | 20.7    | 20.1    | 12.9    | 13.0    | 13.1    | 6.85       | 10.3       | 10.8       | 13.5       | 14.0       | 13.4       |          |          |
| CaO#                             | 1.49    | 1.85    | 6.34    | 7.67    | 9.30    | 1.53    | 2.17    | 0.15    | 0.05       | 0.02       | 0.02       | 0.03       | 0.02       | 0.06       |          |          |
| FeO#                             | 1.45    | 1.28    | 3.61    | 3.38    | 3.79    | 0.93    | 0.94    | 0.85    | 1.44       | 0.62       | 3.09       | 0.92       | 1.06       | 0.64       |          |          |
| K <sub>2</sub> O#                | 2.89    | 2.96    | 4.55    | 5.00    | 4.52    | 2.89    | 2.92    | 2.85    | 1.94       | 3.17       | 3.12       | 4.07       | 4.23       | 3.22       |          |          |
| MgO#                             | 0.46    | 0.39    | 3.21    | 2.67    | 2.79    | 0.34    | 0.36    | 0.28    | 0.10       | 0.17       | 0.19       | 0.28       | 0.29       | 0.32       |          |          |
| MnO#                             | 0.06    | 0.06    | 0.28    | 0.22    | 0.28    | 0.04    | 0.05    | 0.07    | 0.01       | 0.01       | 0.05       | 0.01       | 0.01       | 0.03       |          |          |
| Na <sub>2</sub> O#               | 3.86    | 3.50    | 3.56    | 2.18    | 2.48    | 2.67    | 2.60    | 3.50    | 0.03       | 0.03       | 0.05       | 0.12       | 0.13       | 0.35       |          |          |
| P <sub>2</sub> O <sub>5</sub> #  | 0.07    | 0.06    | 0.33    | 0.36    | 0.37    | 0.04    | 0.04    | 0.02    | 0.02       | 0.01       | 0.01       | 0.02       | 0.03       | 0.01       |          |          |
| SiO <sub>2</sub> #               | 75.5    | 76.7    | 57.5    | 56.7    | 55.2    | 78.3    | 77.7    | 78.9    | 89.4       | 85.5       | 82.4       | 80.7       | 80.0       | 81.7       |          |          |

| TiO <sub>2</sub> # | 0.35 | 0.28 | 0.95 | 1.00 | 0.99 | 0.22 | 0.20 | 0.22 | 0.07 | 0.07  | 0.17 | 0.19  | 0.20  | 0.20 |      |      |
|--------------------|------|------|------|------|------|------|------|------|------|-------|------|-------|-------|------|------|------|
| Ag                 | 0.07 | 0.05 | 0.08 | 0.12 | 0.12 | 0.10 | 0.10 | 0.07 | 0.10 | 0.23  | 1.57 | 0.16  | 0.11  | 0.02 |      |      |
| As                 | 3.20 | 3.60 | 13.9 | 10.0 | 8.80 | 10.8 | 10.2 | 5.50 | 105  | 20.0  | 37.0 | 4.40  | 4.60  | 1.80 | 3.01 | 2.00 |
| Ba                 | 500  | 600  | 330  | 300  | 280  | 310  | 290  | 480  | 30.0 | 80.0  | 100  | 180   | 180   | 470  | 131  | 5.00 |
| Be                 | 1.53 | 1.64 | 1.80 | 2.41 | 2.12 | 1.28 | 1.32 | 1.55 | 0.57 | 0.84  | 0.78 | 1.65  | 1.60  | 1.20 | 1.13 | 0.05 |
| Bi                 | 0.09 | 0.10 | 0.03 | 0.04 | 0.04 | 0.10 | 0.10 | 0.13 | 0.49 | 0.28  | 0.36 | 0.24  | 0.18  | 0.14 |      | 0.01 |
| Cd                 | #N/A | 0.03 | 0.09 | 0.08 | 0.09 | 0.05 | 0.06 | 0.10 | 0.02 | <0.02 | 0.02 | <0.02 | <0.02 | 0.04 | 0.05 | 0.02 |
| Ce                 | 46.6 | 38.7 | 22.4 | 20.7 | 23.4 | 54.0 | 54.8 | 49.6 | 17.9 | 12.7  | 28.3 | 68.8  | 72.1  | 86.7 | 37.0 | 0.50 |
| Co                 | 2.80 | 2.40 | 18.9 | 15.3 | 17.9 | 2.10 | 2.10 | 2.00 | 0.30 | 0.10  | 0.50 | 1.50  | 1.40  | 3.30 | 47.0 | 0.09 |
| Cr                 | 38.0 | 17.0 | 60.0 | 41.0 | 51.0 | 27.0 | 122  | 19.0 | 70.0 | 15.0  | 51.0 | 12.0  | 12.0  | 30.0 | 312  | 1.00 |
| Cs                 | 3.82 | 3.83 | 9.98 | 12.4 | 10.7 | 3.60 | 3.61 | 2.79 | 1.22 | 5.09  | 2.46 | 3.35  | 3.60  | 4.82 | 0.10 | 0.05 |
| Cu                 | 2.60 | 2.70 | 79.4 | 107  | 103  | 2.90 | 3.10 | 3.40 | 3.40 | 7.40  | 41.7 | 6.50  | 6.60  | 3.40 | 140  | 1.00 |
| Dy                 | 2.71 | 2.55 | 1.78 | 2.02 | 2.16 | 3.09 | 3.30 | 3.16 | 2.55 | 3.30  | 2.16 | 2.78  | 2.86  | 3.44 | 5.24 | 0.30 |
| Er                 | 1.81 | 1.79 | 0.95 | 1.01 | 1.10 | 1.98 | 1.96 | 2.15 | 1.98 | 2.73  | 2.16 | 1.98  | 2.01  | 2.25 | 2.46 | 0.50 |
| Eu                 | 0.97 | 0.73 | 0.76 | 0.85 | 0.98 | 0.89 | 0.85 | 0.77 | 0.39 | 0.20  | 0.48 | 0.69  | 0.72  | 0.98 | 2.01 | 0.20 |
| Ga                 | 15.3 | 13.8 | 19.2 | 20.4 | 19.3 | 15.3 | 15.6 | 15.5 | 7.85 | 11.9  | 14.2 | 15.9  | 16.3  | 13.1 | 21.6 | 0.20 |
| Gd                 | 3.36 | 2.71 | 2.12 | 2.48 | 2.74 | 3.57 | 3.46 | 3.38 | 2.36 | 1.70  | 1.48 | 2.78  | 2.83  | 4.23 | 6.03 | 0.50 |
| Ge                 | 0.07 | 0.08 | 0.11 | 0.12 | 0.14 | 0.08 | 0.08 | 0.08 | 0.06 | 0.05  | 0.12 | 0.11  | 0.12  | 0.10 | 1.54 | 0.03 |
| Hf                 | 2.60 | 2.60 | 1.10 | 1.10 | 1.10 | 2.50 | 2.40 | 2.70 | 2.40 | 3.40  | 3.80 | 2.80  | 2.80  | 2.90 | 4.26 | 0.20 |
| Ho                 | 0.59 | 0.59 | 0.34 | 0.38 | 0.42 | 0.65 | 0.70 | 0.68 | 0.85 | 0.70  | 0.48 | 0.61  | 0.59  | 0.72 | 0.96 | 0.01 |
| In                 | 0.04 | 0.04 | 0.04 | 0.04 | 0.04 | 0.03 | 0.03 | 0.04 | 0.03 | 0.07  | 0.08 | 0.04  | 0.04  | 0.04 |      | 0.02 |
| La                 | 23.8 | 20.1 | 10.4 | 9.10 | 10.6 | 28.2 | 29.1 | 25.4 | 9.00 | 7.60  | 15.9 | 38.3  | 41.0  | 38.8 | 15.1 | 3.00 |
| Li                 | 4.20 | 3.90 | 4.50 | 15.2 | 18.0 | 6.10 | 6.10 | 8.00 | 21.0 | 7.60  | 8.20 | 47.8  | 42.4  | 4.20 | 4.73 | 4.00 |
| Lu                 | 0.33 | 0.33 | 0.13 | 0.13 | 0.14 | 0.36 | 0.35 | 0.39 | 0.32 | 0.49  | 0.40 | 0.39  | 0.39  | 0.41 | 0.28 | 0.05 |
| Mo                 | 2.64 | 1.47 | 0.30 | 0.22 | 0.29 | 2.79 | 3.28 | 1.69 | 4.39 | 1.49  | 1.64 | 1.06  | 0.93  | 0.31 | 11.5 | 0.20 |
| Nb                 | 6.30 | 6.40 | 4.20 | 4.00 | 4.00 | 6.70 | 6.60 | 6.80 | 4.30 | 8.30  | 8.30 | 7.90  | 7.40  | 9.90 | 19.2 | 1.00 |

|        |      |      |      |      |      |      |      |      |      |      |      |      |      |      |       |      |
|--------|------|------|------|------|------|------|------|------|------|------|------|------|------|------|-------|------|
| Nd     | 19.5 | 16.2 | 10.5 | 10.9 | 11.9 | 22.0 | 22.2 | 20.4 | 8.50 | 6.00 | 10.8 | 27.3 | 28.1 | 30.7 | 24.4  | 0.10 |
| Ni     | 2.30 | 1.80 | 35.7 | 35.9 | 40.3 | 1.60 | 2.80 | 1.40 | 1.00 | 0.50 | 1.10 | 1.70 | 1.50 | 4.00 | 125   | 0.80 |
| Pb     | 8.20 | 7.80 | 9.80 | 7.70 | 9.80 | 9.20 | 9.90 | 15.7 | 108  | 9.30 | 173  | 23.1 | 23.4 | 17.0 | 1.37  | 1.20 |
| Pr     | 5.20 | 4.30 | 2.62 | 2.53 | 2.83 | 5.95 | 6.15 | 5.60 | 2.18 | 1.58 | 3.02 | 7.62 | 7.95 | 8.40 | 5.34  | 0.03 |
| Rb     | 92.0 | 95.1 | 124  | 108  | 110  | 112  | 114  | 109  | 56.7 | 100  | 102  | 131  | 130  | 104  | 9.68  | 0.20 |
| Sb     | 1.11 | 0.88 | 1.33 | 1.57 | 1.56 | 1.23 | 1.54 | 0.84 | 3.52 | 2.63 | 2.41 | 8.86 | 5.85 | 1.89 | 0.18  | 0.10 |
| Sc     | 9.20 | 8.50 | 18.8 | 17.8 | 19.2 | 6.90 | 6.70 | 7.60 | 6.10 | 7.60 | 12.6 | 7.10 | 7.10 | 5.60 | 32.0  | 0.80 |
| Sm     | 3.68 | 3.04 | 2.16 | 2.37 | 2.62 | 4.23 | 4.22 | 4.01 | 1.89 | 1.47 | 1.81 | 4.83 | 4.57 | 5.43 | 6.01  | 0.03 |
| Sn     | 1.40 | 1.40 | 0.50 | 0.50 | 0.50 | 1.70 | 1.80 | 1.80 | 1.50 | 1.90 | 1.80 | 1.90 | 2.10 | 2.00 | 1.58  | 0.03 |
| Sr     | 150  | 148  | 274  | 160  | 187  | 87.3 | 90.8 | 76.0 | 9.60 | 6.00 | 20.9 | 41.1 | 37.8 | 56.7 | 405   | 1.50 |
| Ta     | 0.46 | 0.50 | 0.26 | 0.26 | 0.25 | 0.55 | 0.53 | 0.53 | 0.34 | 0.67 | 0.56 | 0.60 | 0.58 | 0.72 | 1.16  | 0.20 |
| Tb     | 0.47 | 0.46 | 0.31 | 0.35 | 0.39 | 0.54 | 0.50 | 0.55 | 0.35 | 0.41 | 0.30 | 0.40 | 0.42 | 0.59 | 0.93  | 0.20 |
| Th     | 6.83 | 7.64 | 0.96 | 0.78 | 0.89 | 8.97 | 9.27 | 9.38 | 4.78 | 9.81 | 8.65 | 10.7 | 10.3 | 11.8 | 1.22  | 1.00 |
| Ti     | 0.18 | 0.15 | 0.48 | 0.49 | 0.48 | 0.12 | 0.11 | 0.11 | 0.04 | 0.04 | 0.10 | 0.11 | 0.11 | 0.11 | 17752 | 0.01 |
| Tl     | 0.50 | 0.54 | 0.90 | 0.86 | 0.77 | 0.59 | 0.60 | 0.57 | 0.38 | 0.61 | 0.65 | 0.84 | 0.82 | 0.67 |       | 0.30 |
| Tm     | 0.30 | 0.29 | 0.13 | 0.14 | 0.16 | 0.33 | 0.32 | 0.35 | 0.30 | 0.45 | 0.32 | 0.33 | 0.34 | 0.36 | 0.33  | 0.20 |
| U      | 1.80 | 1.90 | 0.30 | 0.30 | 0.20 | 2.10 | 2.20 | 2.40 | 2.20 | 2.30 | 2.40 | 3.40 | 3.30 | 2.60 | 0.40  | 0.10 |
| V      | 190  | 16.0 | 172  | 197  | 177  | 14.0 | 13.0 | 13.0 | 7.00 | 3.00 | 7.00 | 10.0 | 12.0 | 7.00 | 335   | 2.00 |
| W      | 1.30 | 1.10 | 1.20 | 1.20 | 1.30 | 1.10 | 1.00 | 0.70 | 1.00 | 0.80 | 1.00 | 1.30 | 1.10 | 0.70 | 0.25  | 0.20 |
| Y      | 16.0 | 16.3 | 9.70 | 10.8 | 12.5 | 19.2 | 18.8 | 19.8 | 16.6 | 21.1 | 15.6 | 18.4 | 18.5 | 21.4 | 27.1  | 0.50 |
| Yb     | 1.97 | 2.03 | 0.86 | 0.86 | 0.93 | 2.28 | 2.39 | 2.43 | 2.05 | 3.16 | 2.45 | 2.38 | 2.48 | 2.54 | 4.26  | 0.20 |
| Zn     | 49.0 | 43.0 | 74.0 | 71.0 | 82.0 | 36.0 | 36.0 | 66.0 | 30.0 | 69.0 | 40.0 | 74.0 | 71.0 | 45.0 | 104   | 5.00 |
| Zr     | 87.7 | 87.9 | 41.5 | 38.8 | 41.7 | 80.2 | 77.9 | 85.9 | 85.1 | 91.4 | 142  | 84.2 | 86.4 | 83.1 | 175   | 5.00 |
| Ce/Ce* | 0.87 | 0.87 | 0.89 | 0.90 | 0.89 | 0.87 | 0.85 | 0.87 | 0.84 | 0.76 | 0.85 | 0.84 | 0.83 | 1.00 |       |      |
| Eu/Eu* | 0.94 | 0.87 | 1.21 | 1.20 | 1.25 | 0.78 | 0.76 | 0.71 | 0.63 | 0.43 | 1.00 | 0.64 | 0.68 | 0.70 |       |      |
| ΣREE   | 111  | 93.8 | 55.4 | 53.8 | 60.3 | 128  | 130  | 118  | 50.5 | 42.4 | 70.0 | 159  | 166  | 185  |       |      |

|                      |      |      |      |      |      |      |      |      |      |      |      |      |      |      |
|----------------------|------|------|------|------|------|------|------|------|------|------|------|------|------|------|
| LREE                 | 99.7 | 83.0 | 48.8 | 46.4 | 52.3 | 115  | 117  | 105  | 39.8 | 29.5 | 60.3 | 147  | 154  | 171  |
| HREE                 | 11.5 | 10.8 | 6.62 | 7.37 | 8.04 | 12.8 | 12.9 | 13.0 | 10.7 | 12.9 | 9.75 | 11.6 | 11.9 | 14.5 |
| (La/Yb) <sub>N</sub> | 7.17 | 5.88 | 7.18 | 6.28 | 6.77 | 7.34 | 7.23 | 6.21 | 2.61 | 1.43 | 3.85 | 9.55 | 9.82 | 9.07 |
| (La/Sm) <sub>N</sub> | 4.04 | 4.13 | 3.01 | 2.40 | 2.53 | 4.17 | 4.31 | 3.96 | 2.98 | 3.23 | 5.49 | 4.96 | 5.61 | 4.47 |
| (Gd/Yb) <sub>N</sub> | 1.05 | 0.82 | 1.51 | 1.77 | 1.81 | 0.96 | 0.89 | 0.85 | 0.71 | 0.33 | 0.37 | 0.72 | 0.70 | 1.02 |
| SM/Th                | 0.54 | 0.40 | 2.25 | 3.04 | 2.94 | 0.47 | 0.46 | 0.43 | 0.40 | 0.15 | 0.21 | 0.45 | 0.45 | 0.46 |
| Th/Y                 | 0.43 | 0.47 | 0.10 | 0.07 | 0.07 | 0.47 | 0.49 | 0.47 | 0.29 | 0.46 | 0.55 | 0.58 | 0.55 | 0.55 |
| Ba/Th                | 73.2 | 78.5 | 343  | 384  | 314  | 34.5 | 31.2 | 51.1 | 6.28 | 8.15 | 11.5 | 16.8 | 17.5 | 39.8 |
| Ba/La                | 21.0 | 29.8 | 31.7 | 32.9 | 26.4 | 10.9 | 9.97 | 18.9 | 3.33 | 10.5 | 6.29 | 4.70 | 4.39 | 12.1 |
| Ba/Nb                | 79.3 | 93.7 | 78.5 | 75.0 | 70.0 | 46.3 | 43.9 | 70.5 | 6.98 | 9.64 | 12.0 | 22.7 | 24.3 | 47.4 |
| Th/Ce                | 0.15 | 0.20 | 0.04 | 0.04 | 0.04 | 0.17 | 0.17 | 0.19 | 0.27 | 0.77 | 0.31 | 0.16 | 0.14 | 0.14 |

Note: FeO\*Ztotal iron as FeO, LOI=loss on ignition. Major elements (#) have been normalized to 100 wt % on the basis of volatile free.
